# Supplementary material
Source: PubMed Central journal article supplement (PMC2825389)
Supplement: NIHMS130890-supplement-Supp_Mat.pdf [file NIHMS130890-supplement-Supp_Mat.pdf]

# Cost Function Weights

John G. Archie, Martin Paluszewski, and Kevin Karplus

May 7, 2009

## 1 Cost Function Weights

To compute the predicted quality, we computed the linear sum of component cost functions. The combined cost,  $x$  below, was then converted to a predicted quality score by a sigmoidal function:

$$q(x) = \frac{1}{1 + e^{ax+b}}$$

where the constants  $a$  and  $b$  were fitted to the CASP7 training data.

Additionally, not all cost functions are on the same scale. For this reason, we report the pooled standard deviation (P. SD), which measures the pooled standard deviation of the cost function term times the weight for the training data. The pooled standard deviation is a better indicator of the relative importance of different cost function terms.

For SAM-T08-MQAU (Undertaker) and SAM-T08-MQAC (Undertaker+constraints), we used separate cost functions for easy and difficult targets. Difficulty was assessed by the e-value of the best template alignment.

### 1.1 MQAO/Alignment Constraints

For the SAM-T08-MQAO group, we used the following component cost functions. For quality prediction, the fitted sigmoidal function used constants of  $a = 0.0384$  and  $b = 0.901$ .

| Cost Function     | Weight | P. SD | Description                              |
|-------------------|--------|-------|------------------------------------------|
| align_bonus       | 55.527 | 9.542 | selected alignment predicted constraints |
| rejected_bonus    | 42.886 | 3.358 | rejected alignment predicted constraints |
| align_constraints | 1.586  | 1.009 | selected alignment predicted constraints |

### 1.2 MQAU/Undertaker: Low E-value Targets

For the easy targets (best e-values less than 0.31687) in the SAM-T08-MQAU group, we used the following component cost functions. For quality prediction, the fitted sigmoidal function used constants of  $a = 0.0175$  and  $b = -0.0465$ .

| Cost Function     | Weight | P. SD  | Description                                                                                 |
|-------------------|--------|--------|---------------------------------------------------------------------------------------------|
| align_sheets      | 6.524  | 24.104 | sheet constraints from alignments                                                           |
| align_constraints | 32.082 | 22.036 | selected alignment predicted constraints                                                    |
| pred_nb11_back    | 25.177 | 5.788  | neural net predicted burial, near-backbone-11 alphabet                                      |
| missing_atoms     | 0.012  | 5.233  | the number of missing atoms in the model                                                    |
| pred_alpha_back   | 10.614 | 3.845  | neural net predicted alpha torsion angle                                                    |
| rejected_bonus    | 19.142 | 1.662  | rejected alignment predicted constraints                                                    |
| phobic_fit        | 0.218  | 1.184  | hydrophobic radius of gyration <sup>1</sup>                                                 |
| sidechain_clashes | 2.723  | 0.871  | number of severe sidechain clashes                                                          |
| contact           | 0.602  | 0.773  | average number of contacts (centroids of the backbone and sidechain within 8 Å) per residue |
| pred_cb14_back    | 2.902  | 0.768  | neural net predicted burial, C <sub>β</sub> -14 alphabet                                    |

### 1.3 MQAU/Undertaker: High E-value Targets

For the hard targets (best e-values greater than 0.31687) in the SAM-T08-MQAU group, we used the following component cost functions. For quality prediction, the fitted sigmoidal function used constants of  $a = 0.0345$  and  $b = 2.10$ .

| Cost Function    | Weight | P. SD | Description                                                                       |
|------------------|--------|-------|-----------------------------------------------------------------------------------|
| pred_alpha_back  | 14.199 | 6.338 | neural net predicted alpha torsion angle                                          |
| CBCContact       | 1.321  | 2.441 | average number of contacts (C <sub>β</sub> atoms within 8 Å)                      |
| nn1000           | 20.236 | 2.338 | neural net predicted residue-residue distance constraints                         |
| pred_cb14_back   | 9.255  | 1.978 | neural net predicted burial, C <sub>β</sub> -14 alphabet                          |
| pred_nb11_back   | 7.111  | 1.652 | neural net predicted burial, near-backbone-11 alphabet                            |
| noncontact_bonus | 0.487  | 1.373 | alignment predicted noncontacts                                                   |
| ehl2_constraints | 0.155  | 1.253 | neural net predicted secondary structure constraints                              |
| rejected_bonus   | 34.923 | 1.132 | rejected alignment predicted constraints                                          |
| hbond_geom       | 5.817  | 0.828 | measure of good hydrogen bond distance and geometry                               |
| knot             | 3.356  | 0.750 | detects knotted proteins                                                          |
| bystroff         | 3.133  | 0.577 | propensity predicted Bystroff alphabet                                            |
| sidechain        | 0.000  | 0.469 | the negative log-probability of observing the sidechain and backbone conformation |

### 1.4 MQAC/Undertaker+Consensus: Low E-value Targets

For the easy targets (best e-values less than 6.9768e-15) in the SAM-T08-MQAC group, we used the following component cost functions. For quality prediction, the fitted sigmoidal function used constants of  $a = 0.0455$  and  $b = 2.35$ .

| Cost Function      | Weight | P. SD | Description                                                  |
|--------------------|--------|-------|--------------------------------------------------------------|
| sim_TM             | 42.200 | 7.970 | median TMscore consensus measure                             |
| sim_GDT_TS         | 34.939 | 6.760 | median GDT_TS consensus measure                              |
| pred_nb11_back     | 6.748  | 1.510 | neural net predicted burial, near-backbone-11 alphabet       |
| pred_alpha_back    | 3.663  | 1.231 | neural net predicted alpha torsion angle                     |
| pred_CB8_sep9_back | 3.864  | 0.810 | neural net predicted burial, CB8_sep9 alphabet               |
| pred_cb14_back     | 2.500  | 0.659 | neural net predicted burial, C <sub>β</sub> -14 alphabet     |
| CAContact          | 0.455  | 0.574 | average number of contacts (C <sub>α</sub> atoms within 8 Å) |
| cb14               | 2.046  | 0.553 | propensity predicted burial, C <sub>β</sub> -14 definition   |
| contact_order      | 1.571  | 0.254 | average chain separation of contacting residues              |
| alpha_prev         | 0.619  | 0.167 | propensity predicted alpha angle of the previous residue     |
| pred_o_sep_back    | 0.754  | 0.120 | predicted H-bond sequence separation for O                   |
| pred_n_sep_back    | 0.635  | 0.096 | predicted H-bond sequence separation for N                   |

## 1.5 MQAC/Undertaker+Consensus: High E-value Targets

For the hard targets (best e-values greater than 6.9768e-15) in the SAM-T08-MQAC group, we used the following component cost functions. For quality prediction, the fitted sigmoidal function used constants of  $a = 0.0406$  and  $b = 1.79$ .

| Cost Function        | Weight | P. SD | Description                                                                       |
|----------------------|--------|-------|-----------------------------------------------------------------------------------|
| sim_GDT_TS           | 62.884 | 6.959 | median GDT_TS consensus measure                                                   |
| sim_TM               | 14.873 | 1.736 | median TMscore consensus measure                                                  |
| align_bonus          | 12.702 | 1.697 | selected alignment predicted constraints                                          |
| pred_alpha_back      | 2.720  | 1.155 | neural net predicted alpha torsion angle                                          |
| pred_nb11_back       | 4.576  | 1.084 | neural net predicted burial, near-backbone-11 alphabet                            |
| align_sheets         | 1.145  | 0.894 | sheet constraints from alignments                                                 |
| rejected_constraints | 0.767  | 0.279 | rejected alignment predicted constraints                                          |
| sidechain            | 0.000  | 0.134 | the negative log-probability of observing the sidechain and backbone conformation |
| knot                 | 0.305  | 0.078 | detects knotted proteins                                                          |
| noncontact           | 0.024  | 0.073 | alignment predicted noncontacts                                                   |

## References

1. Alexander, P. A., He, Y., Chen, Y., Orban, J., and Bryan, P. N. The design and characterization of two proteins with 88% sequence identity but different structure and function. *Proc Natl Acad Sci USA* 104(29):11963–11968, July, 2007.

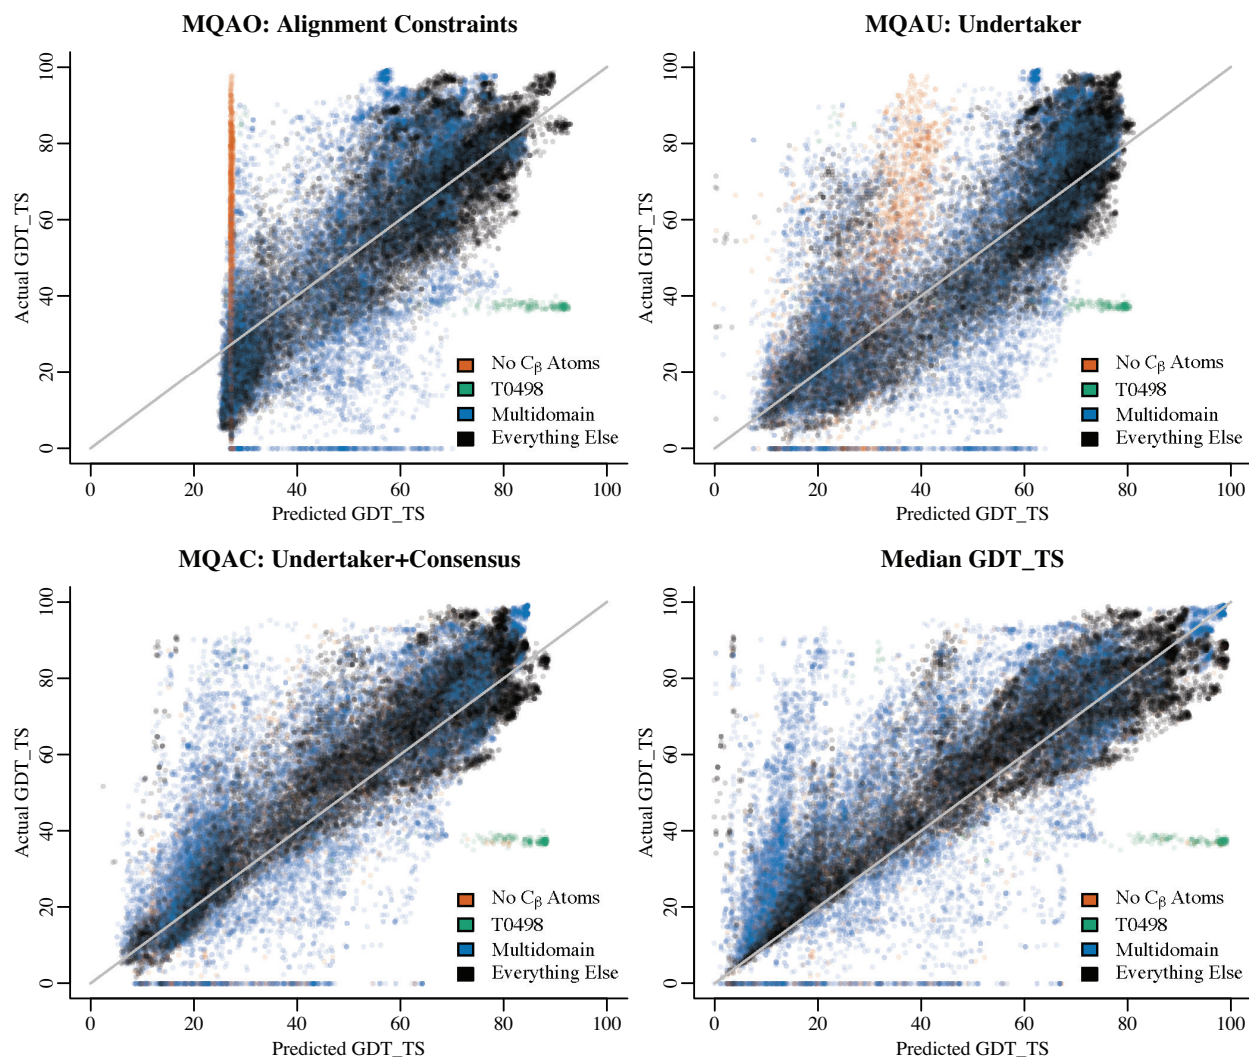

Figure 1: Predicted and actual GDT\_TS scores for all target domains and all servers. Three of the plots are for submissions by groups SAM-T08-MQAO, SAM-T08-MQAU, and SAM-T08-MQAC. Median GDT\_TS is a pure consensus term, which we did not submit to CASP8. T0498 and T0499 were engineered proteins, differing in only three amino acids but assuming different folds. Both structures are related to those previously described by Alexander et al.<sup>1</sup>

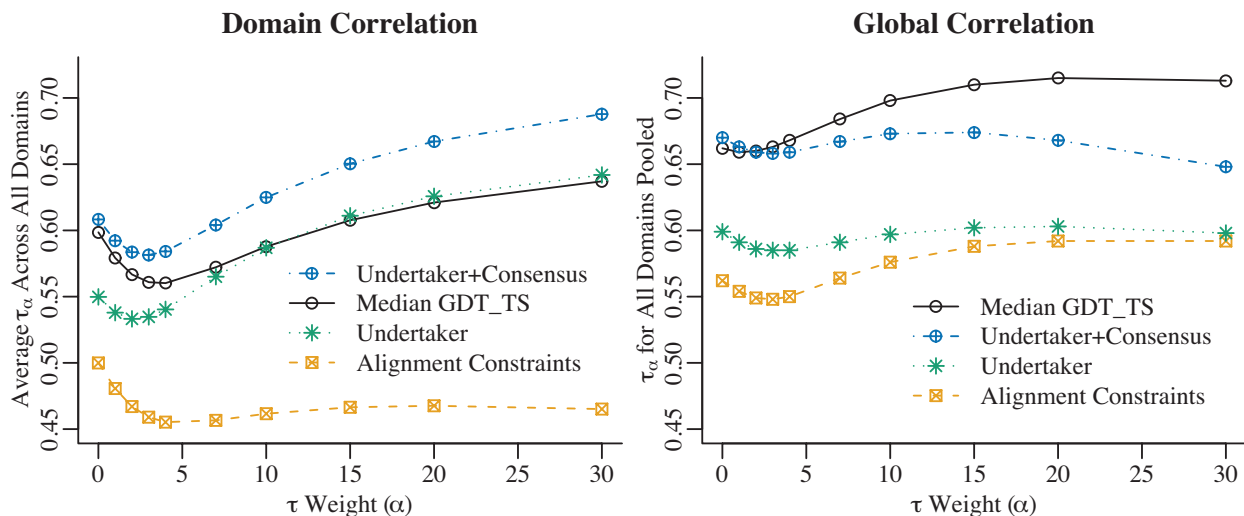

Figure 2: Correlation values for each function. Increasing values of  $\alpha$  place increasing weight on the predicted-best set of models. An  $\alpha$  value of 0 is equivalent to Kendall’s  $\tau$ , treating all models equally. Values of 0, 3, 5, 15, and 30 place half of the weight on the top 50%, 23%, 14%, 5%, and 2.3% of models. The domain correlation plot shows the average  $\tau$  value over all target domains, with correlation computed separately for each target domain. The global correlation plot shows the  $\tau$  value computed from combining all predictions into a single set. Adding Undertaker cost function terms to the consensus median GDT\_TS method improved the ranking of models within a target, particularly when concentrating on the top-scoring models. Median GDT\_TS alone is a better predictor of raw GDT\_TS value, especially for picking out the easy targets, but does not do as well at ranking models for a given target. “Alignment Constraints” is SAM-T08-MQAO, “Undertaker” is SAM-T08-MQAU, “Undertaker+Consensus” is SAM-T08-MQAC, and “Median GDT\_TS” is the pure consensus term, which we did not submit to CASP8.

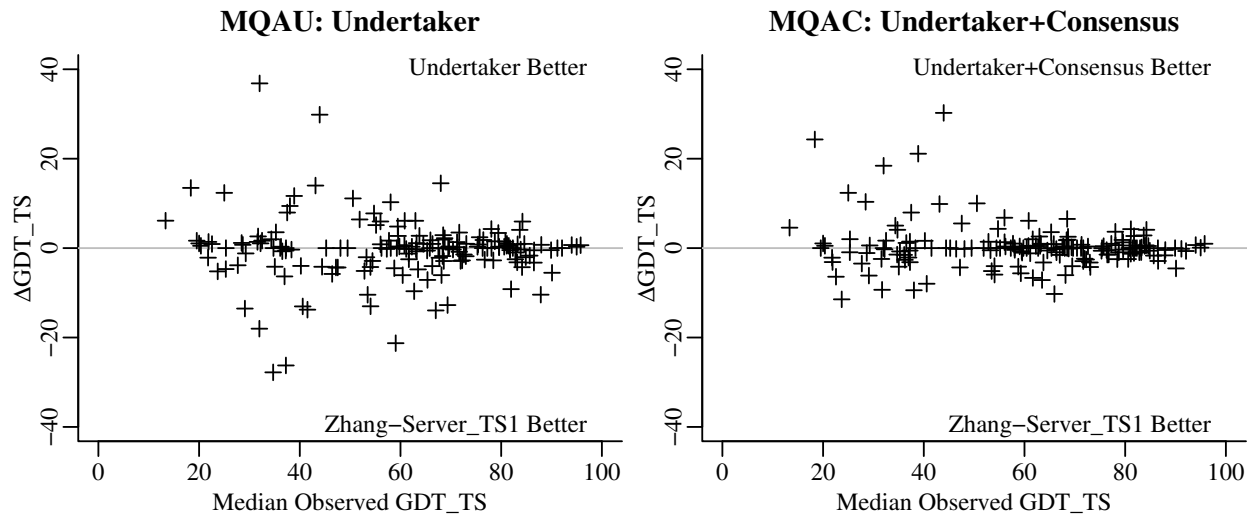

Figure 3: Undertaker (SAM-T08-MQAU) and Undertaker+Consensus (SAM-T08-MQAC) functions as metaservers compared to the best single server in the pool. The median observed GDT\_TS score of all server models is used as a proxy for target difficulty. Using MQAC does slightly better than the Zhang server, but without the consensus term, the difference between the metaserver and Zhang server is quite small. Neither difference is statistically significant.
